# Supplementary material for: Indoleamine-2,3-Dioxygenase in Thyroid Cancer Cells Suppresses Natural Killer Cell Function by Inhibiting NKG2D and NKp46 Expression via STAT Signaling Pathways
Source: MDPI journal article supplement (doi:10.3390/jcm8060842), 2019-06-12
Supplement: s1 [file s1]

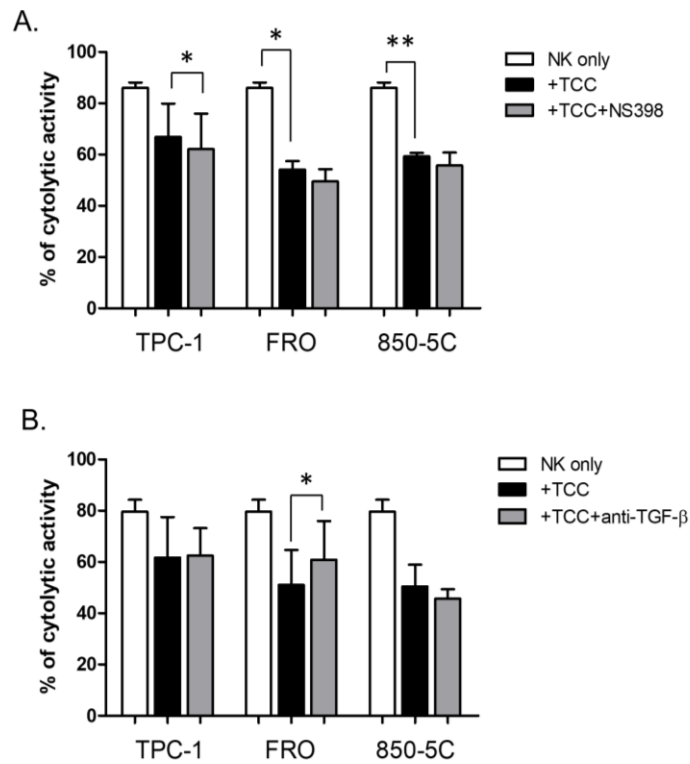

**Supplementary Figure 1.** Effect of PGE2 and TGF- $\beta$  blockade on restoring NK activity in the co-culture system. **(A)** NK cells were cultured for 24 h with IL-2 either alone (NK only, white) or co-culture with indicated thyroid cancer cells (TCC). NK/thyroid cell co-cultures were set either in the absence (black) or in the presence (gray) of inhibitor of PGE2, NS398 at 2  $\mu$ M. **(B)** NK/thyroid cell co-cultures were set in the presence of anti-TGF- $\beta$  (gray). K562 cells were used as target cells and the effector:target (E:T) ratio was 10:1. Bars represent mean  $\pm$  SD of three independent experiments.

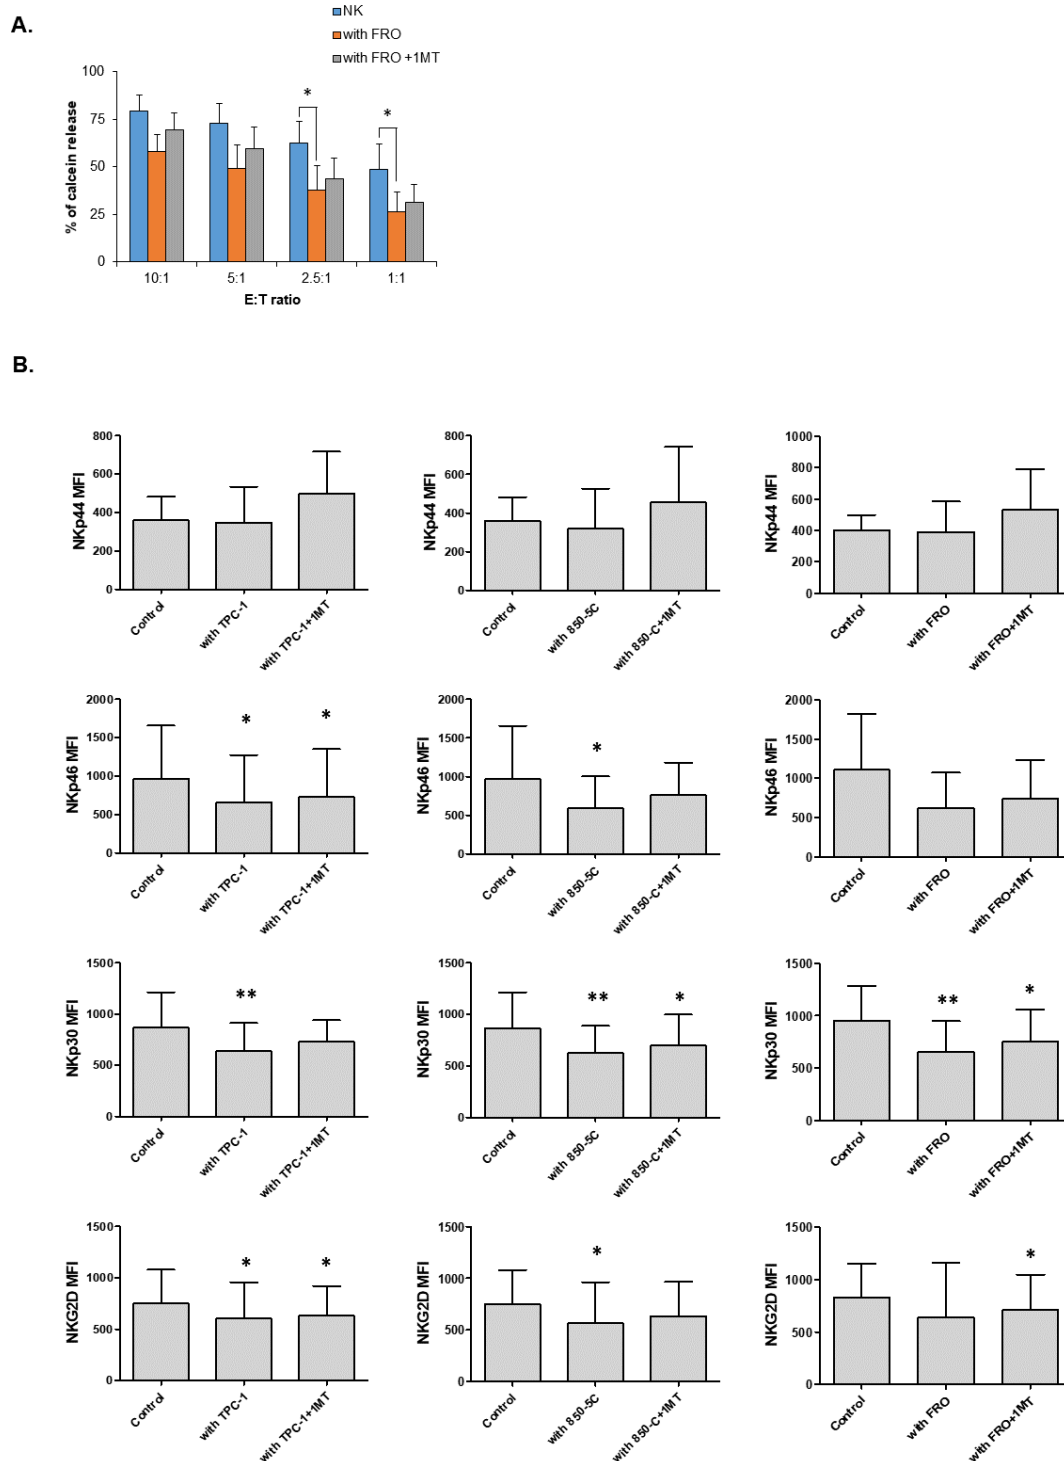

**Supplementary Figure 2.** IDO inhibitor (1MT) partially restores NK cell activity and NK receptor expressions reduced by thyroid cancer. (A) NK cells were cultured for 24 h with IL-2 either alone (blue) or with FRO thyroid cancer cells. NK/FRO cell co-cultures were set either in the absence (orange) or in the presence (gray) of IDO inhibitor. Bars represent mean  $\pm$  SD of five independent experiments. (B) Expressions of NK receptors, including NKp44, NKp46, NKp30, and NKG2D were detected by flow cytometry. Graphs represent mean values of MFI for five independent experiments of receptors. Statistical analyses were performed using the paired two-tailed Student's t-test. \*  $P < 0.05$  and \*\*  $P < 0.01$ .

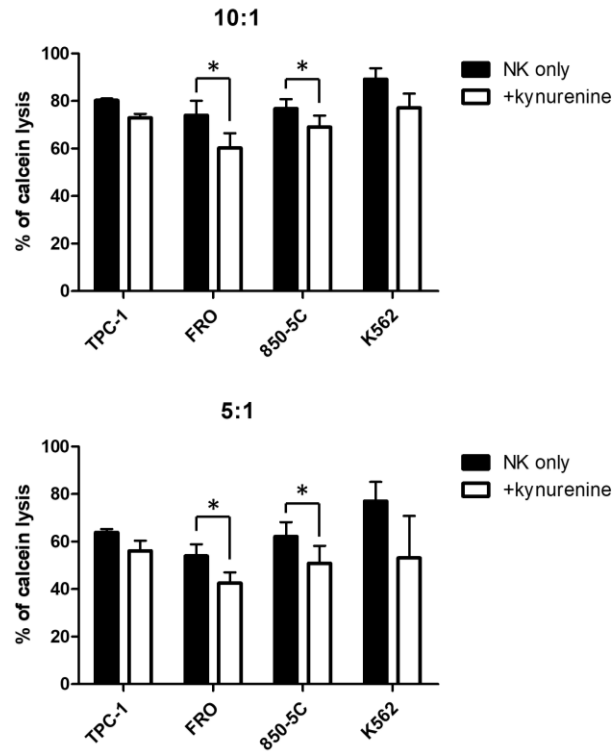

**Supplementary Figure 3.** Cytolytic activity of NK cells treated with kynurenine against thyroid cancer cells (A) NK cells were cultured for 24 h with IL-2 either in the absence (NK only, black) or in the presence of kynurenine 0.5 mM (white). TPC-1, FRO, 850-5C, and K562 cells were used as target cells at effector:target (E:T) ratios of 10:1 and 5:1. Bars represent mean  $\pm$  SD of three independent experiments. Statistical analyses were performed using the paired two-tailed Student's t-test. \*  $P < 0.05$ .

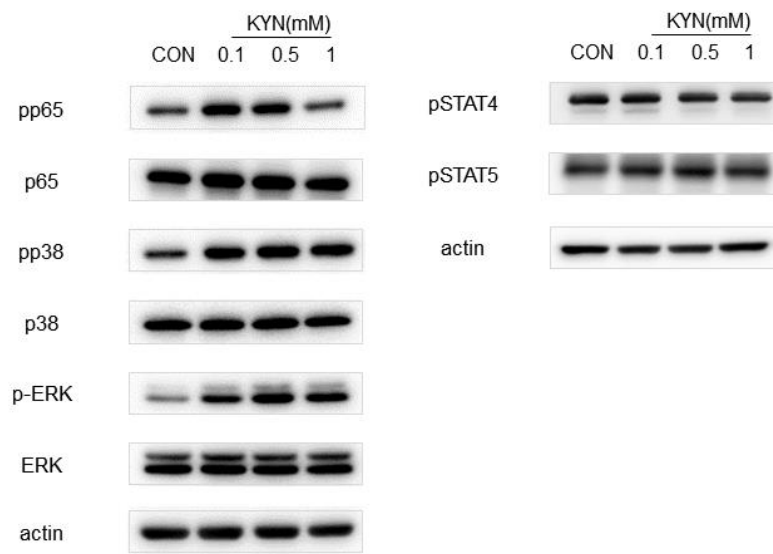

**Supplementary Figure 4.** Western blot analysis of the activation of other signals related to NK activity. Phosphorylation of pSTAT4, pSTAT5, p65, p38, and ERK signals were analyzed by Western blotting after kynurenine treatment in NK cells.  $\beta$ -actin served as a loading control.

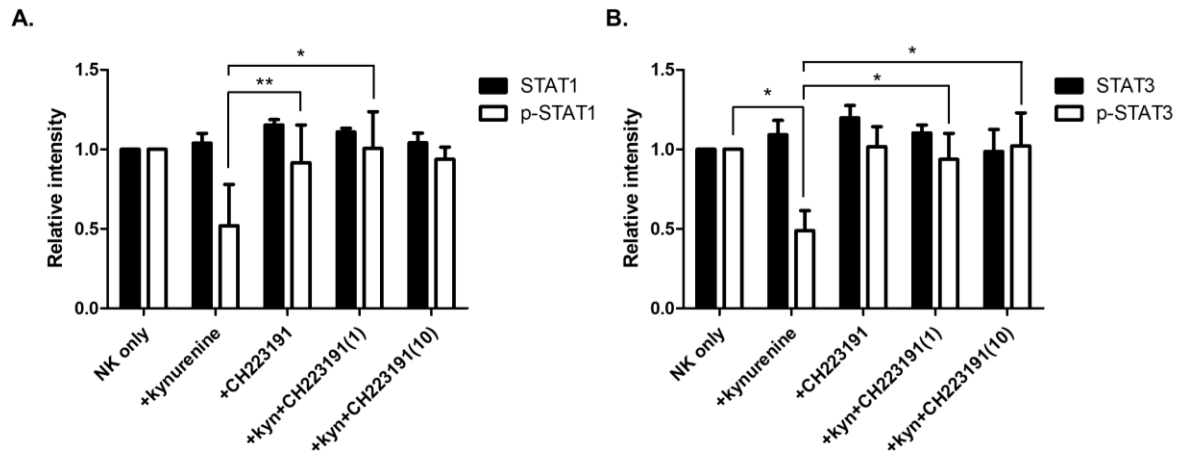

**Supplementary Figure 5.** Kynurenine inhibits STAT signals in NK cell through AhR. **(A)** Phosphorylation of STAT-3 and 1 signal were examined by Western blotting in NK cells treated with the indicated agent. Relative intensity is defined as the intensity of the target protein normalized to  $\beta$ -actin. Bars represent mean  $\pm$  SD of three independent experiments. Statistical analyses were performed using the paired two-tailed Student's t-test. \*  $P < 0.05$  and \*\*  $P < 0.01$ .

#### NKp46 promoter

>hg38\_knownGene\_uc061ctw.1 range=chr 19:54904663-54906187 5'pad=0 3'pad=0  
strand=+ repeatMasking=none

gttgggactacaggcatgtgccaccacacccggctaattttgaatttttagtagagacagggtttctgcatgttg  
gtcaggctggctcgaactcccgacctaaagtgatccacctgcctcagcctcccaagtgctgggatgacaggcc  
tgagccaccgtgtctggccagttatttggttttctgtttctgtgttaactcgcttaggataatggcctctagctgc  
atccatgttgcgcaaggacataatcttgtgattttcaaggctgtatagcgttctgtgggtatatacatatcac  
attgtctttatccagtcacacctctgatgggacctgggtggattccatgtcttactattgtgaatcctgctgcaa  
tgaacatacaagtgcatgtgtcttttggtagaatgattattttcctttggctatataccacagcatgggatfg  
ctgggctgaatggtaactctgtttgtagtctctgaatatctccaaaccaaactgctttccacagtggtgaac  
taatttacaccaccaacagtgataagtgccctttgctccacaatctcaccagcatctgttaatttctggct  
tttcagtaattggccattctgactgggtgtgagatgggtattgttgaggataatttaggaatcagagagaccgggg  
gttgaggaggatttattattattattatttaggtgcaccggcccgatcagattacatccaaaagactga  
ggctcgaacagagagtgccgtttaccttttaagcattttgtgggttgggggagatctgtcagggggaagcatat  
tacagaagcaagaacaaaggcagttattcaattgagacatgcacatttcttacttttcaagaaaaata  
tgttttacgacttgagggttactctgtctagtgaccttgacggcgacggcagagaacagggtcttcacaatgc  
ctgggaaggagagataaggctcactagccacagacagaaaaacaggcagttcatgtttaaaggactccacctc  
tttctcttctcgggggaactgggttttcttaatacaactgagttttgtttacacattctgtaatttctttt  
aattcctgttccagtatctcactgtgaaactccctatgttttatcgaattctcaggggttttctctggcatg  
attgggcacaacttcccacagtcagctctgggtacgacctccacattgcagaattgagaagtgacccagaatg  
catttttgggctgagcagacaattgtcagagttgctggctagaccacagatgtgtcagaggaccacggccttct  
gtaagctcatggtcagaggcggaggagggtgtgaaacttctgatgaaagcagtcacgtgaaagcgtctgggtg  
atgggcgtggtgctcaccaccacttctgtgtatctatctcctggccggccggctcagtcacctgctca  
GCACTAGGCGCGCAGAATCTGAGCG

#### NKG2D promoter

>hg38\_knownGene\_uc009zhj.4 range=chr 12:10388811-10391518 5'pad=0 3'pad=0  
strand=- repeatMasking=none

aacatattttcttcaactgttttatattcacctatcttgtttaattttgaatttgttttatacttattcatttt  
atatcacctaaactaaaaagtaatttccagctgggtgtgggtgctcacgtctgtaattcagcacattgggaggc  
tgaggcaggaggatcacctgaggtcaggagtgcgagaccagcctgactaacatggtgaaacctcgtctctactag  
aaatacaaaaaattagccagggtgtgggtgcacatgcctgtaatcccagttattctggaggctgagacaggagaatt  
gcttgaacccagggtggcggagggtgcagtgagccgagatcgcccggtgcactccagcctggacaacaagagtgga  
aactccatctcttaaaaaaaaaaaaaaaaaaagtaatttaattccatgtgggcaaaaactttcttttggatgtt  
tactttgacattctcaagatctagaaaaagtgcatagcaaatagcattcgctaaagaaaaaaatgttgaataaat  
ttattgtccaactttaacacatcaccacatgaagcgtgttttcttcttataattcagagttttaagatttaata  
gctttgggtttttgttaaatgttataatgtgttcatcttatattactttatattgatgtcttatgttagtattta  
aatttaataacataaaatataatttagcttatcttgttcatgggtatcaattcatatatttcttatgtatc  
tgggtatataatttaagtttctaatctcctgcataatgatgatatgacagagatgcaatttcatgttttta  
tattaaaaattaaaaattcccaggactaatttttgttaacttaaggccagtgatagtaacccaggacaatt  
attgaataggagctaatttccactttatctgcaatgttaccttatatttttaattctatgcacatgacttttc  
tgtctgtatttttacccttctcaatttgtctatctatgccccacatgccactttgcctttattaatcgggtttt  
aacataggctcttactatctagtaaaacaaggctcccacattttcttcatcttcaatttgtgactttcctagtctg  
acttttgttaatttaattgtacatgtagaattctgctttgttaagttctacaacaaacctgaggatattactggaat  
tgaattgaatctctaaaaatatttaggattaaatggcatcatttaatttcatcattttcaaatcctaaaaatgttat  
ttaaaataatggcaaaactacaattacttttgaccaacctaacattatccaacaatgggtggtcttaactctt  
ttaccaaattaacaatatttttagtgataaggcgggaagtactgtggtttatgtttttccacaggaagatgaga  
ttataatatttgtcacatctttctcaaagatagaatttcaataagtatctccactttcaattctagatcaggaaac  
TGAGGACATATCTAAATTTTCTAGTTTTATAGAAGGCTTTTATCCACAAGATCAAGATCTTCCCTCTCTGAGCA  
GGAACTCTTTGTGATTGAAGACTTTAGATTCTCTCTGCGGTAGACGTGCACTTATAAGTATTTG

**Supplementary Figure 6.** Receptors of NK cells promoter sequences. Promoter sequences of NK receptors and STATs motif (underlined). Promoter sequences were obtained through UCSC page (<https://genome.ucsc.edu/>). The predicted binding motif site in the sequences was determined using a program FIMO.
